# Supplementary material
Source: publisher site journal article supplement (https://www.dovepress.com/article/378533)
Supplement: Supplementary file 1 [file get_supplementary_file.php]

## Supplementary materials

# Assessment of Doctors' and Nurses' Knowledge of Acute Oxygen Therapy

## INFORMATION SHEET

### **PURPOSE OF THE STUDY**

The purpose of the study is primarily to determine knowledge of oxygen therapy in among doctors' and nurses'. This study will enable the researchers to obtain a baseline data in formulating oxygen protocols for the hospital.

### **WHAT IS EXPECTED OF YOU IF YOU AGREE TO PARTICIPATE**

It is expected that those who agree to participate will fill a questionnaire on knowledge of oxygen therapy for 10-15 minutes. The cost of investigations would be borne solely by the researchers and at NO TIME would the patients be required to pay for any tests involved in this study.

**YOUR PARTICIPATION IS VOLUNTARY**- Your participation is voluntary, and you may withdraw at any phase of the study.

**CONFIDENTIALITY** -We will treat information collected from you in absolute confidence. No part or whole of such information shall be divulged to anybody except the investigators. We owe it a duty to keep your records secret.

### **BENEFIT OF PARTICIPATION**

Your participation from this study will contribute to clinical practice improvement and patient care. I at this moment consent to participate in the above-stated study as explained to me and I am also aware that I have the right to withdraw my participation at any point during the study if I so wish. Signature \_\_\_\_\_ Date \_\_\_\_\_

**Please select one answer the by ticking the box and filling the line.**

### **SECTION 1: DOCTOR AND NURSE CHARACTERISTICS**

1. How old are you (at last birthday in years)? \_\_\_\_\_
2. What is your gender? Male  Female
3. Department where you currently work \_\_\_\_\_ Unit/Ward \_\_\_\_\_ (if applicable)
4. What is your profession? Doctor  Nurse  Other
5. Do you have additional qualification aside MBBS/RN? Yes  No  (If Yes Specify) \_\_\_\_\_.
6. How many years have you practice after graduation? \_\_\_\_\_.
7. What is your current position/Job designation? \_\_\_\_\_.
8. How long have you been working in this hospital or health facility? \_\_\_\_\_ .
9. How long ago did you administer oxygen to a patient? <1month  1-6 months  >6 months
10. How long ago did you prescribe oxygen to a patient? <1month  1-6 months  >6 months

## SECTION 2: RELEVANT EDUCATIONAL BACKGROUND

11. Aside from the undergraduate or basic professional training, have you received any CME/ update/ special training on oxygen therapy? Yes  No
12. If yes to question 11, what year did you receive the update/training? \_\_\_\_\_ .
13. What are your major sources of information on the oxygen therapy? (circle response please)
- a) Medical/Nursing training
  - b) Post qualification /in-service training
  - c) Colleagues
  - d) Journals
  - e) Print & electronic media
  - f) Others (specify) \_\_\_\_\_ .

## SECTION 3: AWARENESS AND USE OF OXYGEN THERAPY GUIDELINE

14. Are you aware of WHO / Any other guideline on Oxygen Therapy? Yes  No  if no go to question 17
15. Have you ever read it? Yes  No
16. Have you ever used or applied it your practice? Yes  No

## SECTION 4: GENERAL KNOWLEDGE OF MEDICAL OXYGEN.

17. Oxygen is like any other medication True  False  Don't know
18. Oxygen is not medication but a supportive therapy True  False  Don't know
19. Oxygen should only be given after doctors' prescription True  False  Don't know
20. Oxygen promotes combustion True  False  Don't know

## SECTION 5: RECOGNISING HYPOXAEMIA

21. Hypoxaemia can be recognized by clinical signs True  False  Don't know
22. Blood Gas Analysis is useful for confirming hypoxaemia True  False  Don't know
23. Breathlessness is not always a sign of hypoxaemia True  False  Don't know
24. Pulse oximetry is useful in detecting and monitoring hypoxaemia True  False  Don't know
25. SpO2 level < 90 % in adults define hypoxaemia True  False  Don't know

## SECTION 6: INDICATIONS FOR ACUTE OXYGEN

Indications for Acute Oxygen Therapy include

26. Central Cyanosis True  False  Don't know
27. Asymptomatic Anaemia True  False  Don't know
28. Eclampsia True  False  Don't know
29. Restlessness and Convulsion in children True  False  Don't know

Please select one answer by circling either letter a, b, or c

**SECTION 7: OXYGEN PRESCRIPTION**

30. Which of the following should be documented in the treatment (prescription) chart of a patient receiving oxygen?
- a) Oxygen Volume
  - b) Oxygen Flow Rate or FiO<sub>2</sub>
  - c) Oxygen Diffusion Rate
  - d) Don't know
31. Which of the following should be documented in the treatment (prescription) chart of a patient receiving oxygen?
- a) Oxygen Solubility
  - b) Oxygen Source and Delivery Device
  - c) Oxygen Density
  - d) Don't know
32. Which of the following should be documented in the treatment (prescription) chart of a patient receiving oxygen?
- a) Oxygen Odour
  - b) Frequency of Administration
  - c) Oxygen and Nitrogen Concentration
  - d) Don't know
33. Which of the following statement on the prescription of oxygen and delivery is correct?
- a) Nasal catheter oxygen flow rate >5L/min lead to rebreathing of CO<sub>2</sub>
  - b) Oxygen prescription should be to a target saturation range rather than a fixed dose
  - c) Oxygen concentrator delivers maximum oxygen concentration of 70%
  - d) Don't know

**SECTION 8: OXYGEN DELIVERY PRACTICES**

34. A 72-year-old farmer with COPD has carbon dioxide retention (type II respiratory failure), which of this device is appropriate for oxygen delivery to achieve a target saturation of 88-92%?
- a) Nasal catheter at 1-2 L/min/ in the absence of Venturi masks
  - b) Nasal catheter at 16 L/min
  - c) Oxygen mask with reservoir 6-9L/min
  - d) Don't know

35. A 12-year-old boy had type 1 respiratory failure, select one correct initial concentration of oxygen to achieve a target saturation of 94-98%.

- a) FiO<sub>2</sub> of 60%
- b) FiO<sub>2</sub> of 20%
- c) FiO<sub>2</sub> of 150%
- d) Don't know

36. Humidification is essential for patients receiving oxygen through one the following device:

- a) Endotracheal tube or a tracheostomy
- b) Nasal Prong
- c) Oxygen mask
- d) Don't know

37. Regarding weaning and discontinuation of oxygen which of the following statement is true?

- a) Weaning and discontinuation of oxygen therapy should be started if clinically stable on low-dose oxygen
- b) Weaning and discontinuation of oxygen therapy should be commenced after a new chest radiograph is normal
- c) Weaning of oxygen therapy should be initiated if clinically stable on high-dose oxygen
- d) Don't know

What are the major challenges of oxygen administration in the hospital ward and emergency room?

1

---

2

---

3

---

Thank you

## Scoring of question items and Sources of References

| Question | Correct Answers | Sources in the literature                                                                                                                                                                                                                                                                                                                                                             |
|----------|-----------------|---------------------------------------------------------------------------------------------------------------------------------------------------------------------------------------------------------------------------------------------------------------------------------------------------------------------------------------------------------------------------------------|
| 17.      | T               | Bateman NT, et la. ABC of oxygen: acute oxygen therapy.BMJ. 1998; 317:798<br>O'Driscoll BR, et al; BTS guideline for emergency oxygen use in adult patients. Thorax 2008;63(Suppl 6):vi10.                                                                                                                                                                                            |
| 18.      | F               | Bateman NT, et la. ABC of oxygen: acute oxygen therapy.BMJ. 1998; 317:798<br>O'Driscoll BR, et al; BTS guideline for emergency oxygen use in adult patients. Thorax 2008;63(Suppl 6):vi10                                                                                                                                                                                             |
| 19.      | F               | O'Driscoll BR, et al; BTS guideline for emergency oxygen use in adult patients. Thorax 2008;63(Suppl 6):vi3                                                                                                                                                                                                                                                                           |
| 20.      | T               | Bateman NT, et la. ABC of oxygen: acute oxygen therapy.BMJ. 1998; 317:801                                                                                                                                                                                                                                                                                                             |
| 21.      | T               | World Health Organization 2011. Ed Trevor D. The clinical use of oxygen in hospitals with limited resources: Guidelines for healthcare workers, hospital engineers and managers pp.5                                                                                                                                                                                                  |
| 22.      | T               | Bateman NT, et la. ABC of oxygen: acute oxygen therapy.BMJ. 1998; 317:801<br>World Health Organization 2011. Ed Trevor D. The clinical use of oxygen in hospitals with limited resources: Guidelines for healthcare workers, hospital engineers and managers pp.5 and pp.18                                                                                                           |
| 23.      | T               | O'Driscoll BR, et al; BTS guideline for emergency oxygen use in adult patients. Thorax 2008;63(Suppl 6):vi10                                                                                                                                                                                                                                                                          |
| 24.      | T               | World Health Organization 2011. Ed Trevor D. The clinical use of oxygen in hospitals with limited resources: Guidelines for healthcare workers, hospital engineers and managers pp.5                                                                                                                                                                                                  |
| 25.      | T               | Bateman NT, et la. ABC of oxygen: acute oxygen therapy.BMJ. 1998; 317:799<br>World Health Organization 2011. Ed Trevor D. The clinical use of oxygen in hospitals with limited resources: Guidelines for healthcare workers, hospital engineers and managers pp.18-19                                                                                                                 |
| 26.      | T               | World Health Organization 2011. Ed Trevor D. The clinical use of oxygen in hospitals with limited resources: Guidelines for healthcare workers, hospital engineers and managers pp.43                                                                                                                                                                                                 |
| 27.      | F               | World Health Organization 2011. Ed Trevor D. The clinical use of oxygen in hospitals with limited resources: Guidelines for healthcare workers, hospital engineers and managers pp.43                                                                                                                                                                                                 |
| 28.      | T               | O'Driscoll BR, et al; BTS guideline for emergency oxygen use in adult patients. Thorax 2008;63(Suppl 6):vi43                                                                                                                                                                                                                                                                          |
| 29.      | T               | World Health Organization 2011. Ed Trevor D. The clinical use of oxygen in hospitals with limited resources: Guidelines for healthcare workers, hospital engineers and managers pp.43                                                                                                                                                                                                 |
| 30.      | B               | O'Driscoll BR, et al; BTS guideline for emergency oxygen use in adult patients. Thorax 2008;63(Suppl 6):vi55-58                                                                                                                                                                                                                                                                       |
| 31.      | B               | O'Driscoll BR, et al; BTS guideline for emergency oxygen use in adult patients. Thorax 2008;63(Suppl 6):vi55-58                                                                                                                                                                                                                                                                       |
| 32.      | B               | O'Driscoll BR, et al; BTS guideline for emergency oxygen use in adult patients. Thorax 2008;63(Suppl 6):vi55-58                                                                                                                                                                                                                                                                       |
| 33.      | B               | World Health Organization 2011. Ed Trevor D. The clinical use of oxygen in hospitals with limited resources: Guidelines for healthcare workers, hospital engineers and managers pp.47<br>O'Driscoll BR, et al; BTS guideline for emergency oxygen use in adult patients. Thorax 2008;63(Suppl 6):vi55-58                                                                              |
| 34.      | A               | O'Driscoll BR, et al; BTS guideline for emergency oxygen use in adult patients. Thorax 2008;63(Suppl 6):vi52<br>World Health Organization 2011. Ed Trevor D. The clinical use of oxygen in hospitals with limited resources: Guidelines for healthcare workers, hospital engineers and managers pp.47                                                                                 |
| 35.      | A               | Bateman NT, et la. ABC of oxygen: acute oxygen therapy.BMJ. 1998; 317:799                                                                                                                                                                                                                                                                                                             |
| 36.      | A               | O'Driscoll BR, et al; BTS guideline for emergency oxygen use in adult patients. Thorax 2008;63(Suppl 6):vi52<br>Bateman NT, et la. ABC of oxygen: acute oxygen therapy.BMJ. 1998; 317:801<br>World Health Organization 2011. Ed Trevor D. The clinical use of oxygen in hospitals with limited resources: Guidelines for healthcare workers, hospital engineers and managers pp.65-67 |
| 37.      | A               | O'Driscoll BR, et al; BTS guideline for emergency oxygen use in adult patients. Thorax 2008;63(Suppl 6):vi60<br>Bateman NT, et la. ABC of oxygen: acute oxygen therapy.BMJ. 1998; 317:801                                                                                                                                                                                             |

**Bloom's cut-off point:**

Good knowledge score between 80-100% ( $\geq 17$  out of maximum of 21)

Moderate knowledge score between 60 -79% ( $\geq 13$  out of maximum of 21)

Poor knowledge score  $<60\%$  ( $\leq 12$  out of maximum of 21)

**Data entry**

Code on entry to data sheet

Yes- 1 No -2 Don't know -3

True- 1 False -2 Don't know -3

a)-1, b)-2, c)-3 d)-4 e)-5 f)-6

Recode before analysis

Correct answer - 1 and wrong answer- 0
